# Supplementary material
Source: PubMed Central journal article supplement (PMC5696633)
Supplement: NIHMS916944-supplement-supplement_1.pdf [file NIHMS916944-supplement-supplement_1.pdf]

**Supplemental Table 1: Results of Validity Tests for Discharge Destination (nursing home) as a Surrogate of (unfavorable) Outcome Defined by the MRS at 3 and 12 Months Under Various Assumptions by Age Group Strata  $\geq 65$** 

| Discharge Destinations                                       | Positive Predictive Value (%) |         |         | Negative Predictive Value (%) |         |         | Positive Likelihood Ratio (95% CI) |                |                | Negative Likelihood Ratio (95% CI) |               |               |
|--------------------------------------------------------------|-------------------------------|---------|---------|-------------------------------|---------|---------|------------------------------------|----------------|----------------|------------------------------------|---------------|---------------|
|                                                              | MRS 2-6                       | MRS 3-6 | MRS 4-6 | MRS 2-6                       | MRS 3-6 | MRS 4-6 | MRS 2-6                            | MRS 3-6        | MRS 4-6        | MRS 2-6                            | MRS 3-6       | MRS 4-6       |
| Outcome Defined by the MRS at 3mo Under Various Assumptions  |                               |         |         |                               |         |         |                                    |                |                |                                    |               |               |
| Home                                                         | 25                            | 15      | 12      | 14                            | 22      | 40      | 0.2 (0.1-0.3)                      | 0.1 (0.1-0.2)  | 0.1 (0.1-0.3)  | 3.8 (2.7-5.3)                      | 3.1 (2.4-4.0) | 2.1 (1.7-2.5) |
| Relative's/friend's home                                     | 44                            | 39      | 22      | 36                            | 45      | 57      | 0.5 (0.1-1.2)                      | 0.5 (0.2-1.3)  | 0.4 (0.1-1.2)  | 1.05 (0.9-1.11)                    | 1.0 (0.9-1.0) | 1.1 (1.0-1.1) |
| Rehabilitation facility                                      | 89                            | 78      | 55      | 54                            | 62      | 68      | 4.5 (2.8-7.4)                      | 3.0 (2.1-4.3)  | 1.7 (1.3-2.2)  | 0.5 (0.4-0.6)                      | 0.5 (0.4-0.6) | 0.6 (0.5-0.8) |
| Nursing home                                                 | 96                            | 94      | 86      | 43                            | 53      | 67      | 14 (3.5-58)                        | 14 (4.3-43)    | 8.8 (4.1-19)   | 0.77 (0.7-0.8)                     | 0.7 (0.6-0.8) | 0.7 (0.6-0.7) |
| Any nursing home discharge                                   | 90                            | 82      | 64      | 72                            | 82      | 87      | 5.7 (3.6-8.9)                      | 4.00 (2.9-5.4) | 2.5 (2.0-3.0)  | 0.2 (0.2-0.3)                      | 0.1 (0.1-0.3) | 0.2 (0.1-0.3) |
| Outcome Defined by the MRS at 12mo Under Various Assumptions |                               |         |         |                               |         |         |                                    |                |                |                                    |               |               |
| Home                                                         | 29                            | 19      | 17      | 17                            | 26      | 24      | 0.2 (0.1-0.3)                      | 0.20 (0.1-0.3) | 0.3 (0.2-0.4)  | 2.9 (2.2-4.0)                      | 2.5 (2.0-3.2) | 1.8 (1.5-2.2) |
| Relative's/friend's home                                     | 53                            | 41      | 35      | 37                            | 46      | 58      | 0.6 (0.2-1.6)                      | 0.61 (0.2-1.5) | 0.77 (0.2-2.0) | 1.0 (0.9-1.1)                      | 1.0 (0.9-1.0) | 1.0 (0.9-1.0) |
| Rehabilitation facility                                      | 83                            | 72      | 49      | 51                            | 60      | 64      | 2.8 (1.8-4.1)                      | 2.27 (1.6-3.1) | 1.37 (1.0-1.8) | 0.5 (0.4-0.6)                      | 0.6 (0.5-0.7) | 0.8 (0.6-0.9) |
| Nursing home                                                 | 96                            | 92      | 82      | 43                            | 54      | 66      | 14 (3.4-56)                        | 9.82 (3.6-27)  | 6.2 (3.2-12)   | 0.7 (0.7-0.84)                     | 0.7 (0.6-0.8) | 0.7 (0.6-0.8) |
| Any nursing home discharge                                   | 86                            | 78      | 58      | 68                            | 78      | 81      | 3.7 (2.5-5.3)                      | 3.0 (2.3-4.0)  | 1.9 (1.6-2.4)  | 0.3 (0.2-0.4)                      | 0.2 (0.2-0.3) | 0.3 (0.2-0.4) |

**Supplemental Table 2: Results of Validity Tests for Discharge Destination (nursing home) as a Surrogate of (unfavorable) Outcome Defined by the MRS at 3 and 12 Months Under Various Assumptions by Age Group Strata  $< 65$** 

| Discharge Destinations                                       | Positive Predictive Value (%) |         |         | Negative Predictive Value (%) |         |         | Positive Likelihood Ratio (95% CI) |                 |                 | Negative Likelihood Ratio (95% CI) |                  |               |
|--------------------------------------------------------------|-------------------------------|---------|---------|-------------------------------|---------|---------|------------------------------------|-----------------|-----------------|------------------------------------|------------------|---------------|
|                                                              | MRS 2-6                       | MRS 3-6 | MRS 4-6 | MRS 2-6                       | MRS 3-6 | MRS 4-6 | MRS 2-6                            | MRS 3-6         | MRS 4-6         | MRS 2-6                            | MRS 3-6          | MRS 4-6       |
| Outcome Defined by the MRS at 3mo Under Various Assumptions  |                               |         |         |                               |         |         |                                    |                 |                 |                                    |                  |               |
| Home                                                         | 30                            | 22      | 19      | 11                            | 28      | 60      | 0.3 (0.2-0.5)                      | 0.3 (0.18-0.42) | 0.3 (0.1-0.5)   | 6.3 (3.5-11)                       | 3.8 (2.6-5.5)    | 2.5 (1.9-3.2) |
| Relative's/friend's home                                     | 67                            | 67      | 0       | 45                            | 69      | 79      | 1.6 (0.1-1)                        | 3.0 (0.3-33)    | 0.0 (0.03-9.9)  | 0.9 (0.9-1.0)                      | 0.9 (0.9-1.0)    | 1.0 (0.9-1.1) |
| Rehabilitation facility                                      | 89                            | 71      | 37      | 64                            | 78      | 88      | 6.7 (3.4-13)                       | 3.6 (2.4-5.5)   | 2.2 (1.61-3.09) | 0.4 (0.3-0.5)                      | 0.4 (0.3-0.5)    | 0.5 (0.3-0.7) |
| Nursing home                                                 | 90                            | 80      | 70      | 46                            | 62      | 81      | 7.2 (0.9-56)                       | 6.1 (1.3-28)    | 8.7 (2.3-3)     | 0.9 (0.8-0.9)                      | 0.9 (0.8-0.9)    | 0.8 (0.7-0.9) |
| Any nursing home discharge                                   | 89                            | 72      | 41      | 69                            | 83      | 93      | 6.8 (3.61-13)                      | 3.8 (2.6-5.6)   | 2.6 (2.0-3.4)   | 0.4 (0.3-0.5)                      | 0.31 (0.21-0.45) | 0.3 (0.1-0.5) |
| Outcome Defined by the MRS at 12mo Under Various Assumptions |                               |         |         |                               |         |         |                                    |                 |                 |                                    |                  |               |
| Home                                                         | 30                            | 19      | 10      | 20                            | 40      | 69      | 0.4 (0.3-0.5)                      | 0.4 (0.2-0.6)   | 0.5 (0.3-0.8)   | 3.7 (2.4-5.8)                      | 2.5 (1.8-3.5)    | 1.8 (1.4-2.5) |
| Relative's/friend's home                                     | 50                            | 50      | 0       | 48                            | 63      | 81      | 0.9 (0.1-15)                       | 1.7 (0.1-27)    | 0.00 (0.04-1)   | 1.00 (0.97-1.03)                   | 0.9 (0.9-1.0)    | 1.0 (0.9-1.0) |
| Rehabilitation facility                                      | 81                            | 59      | 27      | 66                            | 76      | 86      | 3.9 (2.3-6.5)                      | 2.4 (1.7-3.5)   | 1.6 (1.1-2.3)   | 0.49 (0.38-0.62)                   | 0.5 (0.4-0.7)    | 0.7 (0.5-1.0) |
| Nursing home                                                 | 80                            | 70      | 60      | 50                            | 65      | 83      | 3.7 (0.8-17)                       | 3.9 (1.1-15)    | 6.4 (1.9-22)    | 0.94 (0.88-1.00)                   | 0.9 (0.8-1.0)    | 0.8 (0.7-0.9) |
| Any nursing home discharge                                   | 81                            | 60      | 31      | 70                            | 80      | 90      | 3.9 (2.4-6.2)                      | 2.5 (1.8-3.6)   | 1.9 (1.4-2.6)   | 0.4 (0.3-0.5)                      | 0.4 (0.3-0.6)    | 0.5 (0.3-0.7) |
